# Supplementary material
Source: publisher site journal article supplement (https://kjim.org/upload/media/kjim-2023-311-Supplementary-Fig-6.pdf)
Supplement: Supplementary file 1 [file kjim-2023-311-Supplementary-Fig-6.pdf]

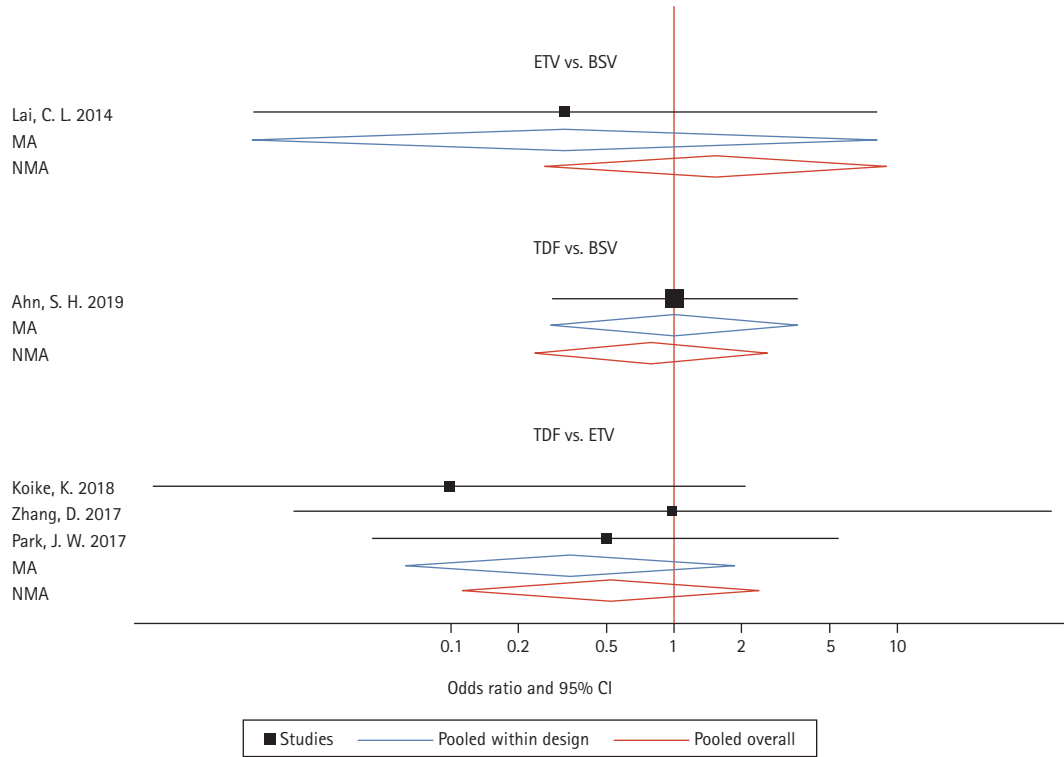

**A** Test of consistency:  $\chi^2(1) = 1.26, p = 0.262$

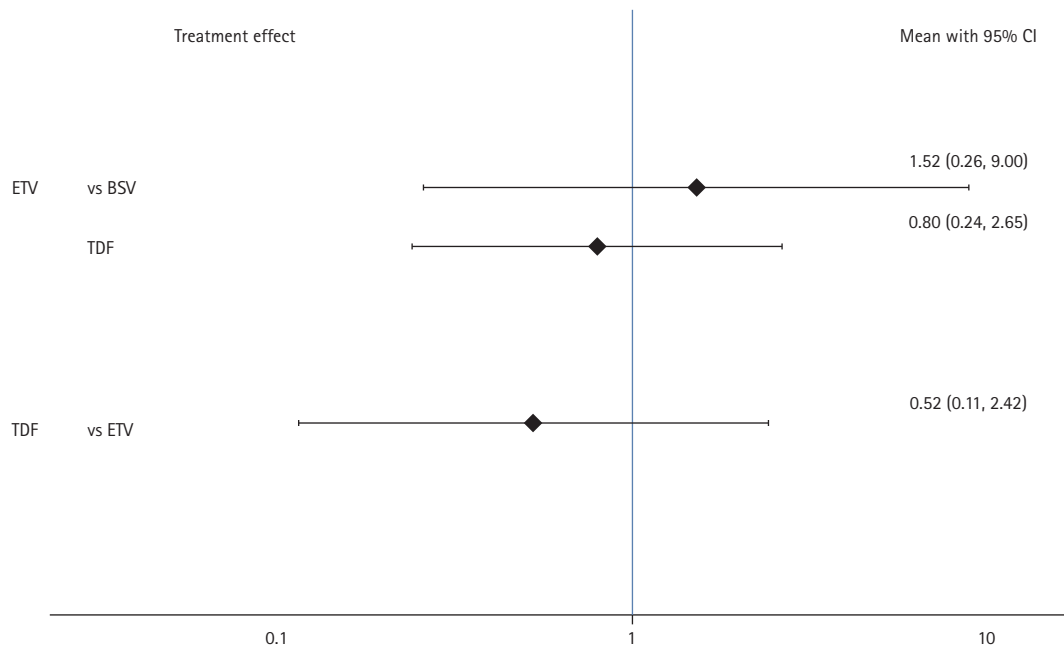

**B**

**Supplementary Figure 6.** (A) Forest plot and (B) interval plot of 48-week virologic breakthrough from 4 RCTs and 1 cohort study. CI, confidence interval; ETV, entecavir; BSV, besifovir dipivoxil maleate; TDF, tenofovir disoproxil fumarate; MA, meta-analysis; NMA, network meta-analysis.
